# Supplementary material for: Efficacy and Safety of Mesenchymal Stem Cell Transplantation in the Treatment of Autoimmune Diseases (Rheumatoid Arthritis, Systemic Lupus Erythematosus, Inflammatory Bowel Disease, Multiple Sclerosis, and Ankylosing Spondylitis): A Systematic Review and Meta-Analysis of Randomized Controlled Trial
Source: Stem Cells Int. 2022 Mar 24;2022:9463314. doi: 10.1155/2022/9463314 (PMC8970953; doi:10.1155/2022/9463314)
Supplement: Supplementary Materials — PRISMA 2020 checklist: checklist. Table S1: search strategies for PubMed and Embase. [file 9463314.f1.zip]

Archive with 2 entries (2 files):
- PRISMA_2020_checklist.pdf
- Table S1. Search Strategies for Pubmed and Embase.pdf
